# Supplementary material
Source: PubMed Central journal article supplement (PMC9891135)
Supplement: ehp11248.s001.acco.pdf [file ehp11248.s001.acco.pdf]

**Note to readers with disabilities:** *EHP* strives to ensure that all journal content is accessible to all readers. However, some figures and Supplemental Material published in *EHP* articles may not conform to [508 standards](#) due to the complexity of the information being presented. If you need assistance accessing journal content, please contact [ehp508@niehs.nih.gov](mailto:ehp508@niehs.nih.gov). Our staff will work with you to assess and meet your accessibility needs within 3 working days.

### **Supplemental Material**

#### **Transportation Noise and Risk of Tinnitus: A Nationwide Cohort Study from Denmark**

Manuella Lech Cantuaria, Ellen Raben Pedersen, Aslak Harbo Poulsen, Ole Raaschou-Nielsen, Ulla Arthur Hvidtfeldt, Gregor Levin, Steen Solvang Jensen, Jesper Hvass Schmidt, and Mette Sørensen

#### **Table of Contents**

**Table S1.** Baseline characteristics of the study population (Denmark, 2000 – 2017) according to road traffic noise exposure at the most exposed façade.

**Table S2.** Spearman correlations between road and railway traffic noise (10-y mean) at baseline.

**Table S3.** Associations between 1-, 5-, and 10-year mean residential exposure to road traffic and railway noise (linear, per 10 dB) and risk of incident tinnitus: i) for the entire population; ii) considering only primary diagnosis of tinnitus; and iii) excluding individuals with previous diagnosis for outer and middle ear diseases.

**Table S4.** Associations between categories of 10-year mean residential exposure to road traffic and railway noise at the most ( $L_{denmax}$ ) and least ( $L_{denmin}$ ) exposed façade and risk of tinnitus.

**Table S5.** Effect modification analysis of associations between 10-y exposure (linear, per 10 dB) of road traffic noise at the most exposed façade and risk for incident tinnitus by sex, education, and hearing loss.

**Figure S1.** Distribution of road traffic noise at the most and least exposure façade (10-year mean at baseline, i.e. time-fixed) for the entire study population ( $N = 3,520,926$ ).

**Figure S2.** Distribution of railway noise at the most and least exposure façade (10-year mean at baseline, i.e. time-fixed) for all individuals exposed to railway noise  $\geq 35$  dB ( $N = 1,577,184$  and  $N = 1,416,509$  for most and least exposed façades, respectively).

**Figure S3.** Association between 10-year mean exposure to railway noise at the most (A) and least (B) exposed façades and risk of tinnitus using the fully adjusted model. The vertical bars show hazard ratios with 95 % confidence interval at the median of the exposure categories compared with the reference category. Reference category was <40 dB. Risk estimates and number of cases for each exposure category are shown in Table S4.

**Table S1.** Baseline characteristics of the study population (Denmark, 2000 – 2017) according to road traffic noise exposure at the most exposed façade.

| <b>Baseline characteristics</b>                             | <b>Entire population<br/>(N = 3,520,926)</b> | <b>&gt;55 dB road traffic noise<br/>(N = 2,164,287)</b> | <b>≤55 dB road traffic noise<br/>(N = 1,356,639)</b> |
|-------------------------------------------------------------|----------------------------------------------|---------------------------------------------------------|------------------------------------------------------|
| Sex (N, men)                                                | 1,728,572                                    | 1,070,709                                               | 657,863                                              |
| Age (mean ± standard deviation)                             | 46.5 ± 14.7                                  | 43.8 ± 14.7                                             | 50.7 ± 13.7                                          |
| Country of origin (N)                                       |                                              |                                                         |                                                      |
| Denmark                                                     | 3,485,837                                    | 2,140,291                                               | 1,345,546                                            |
| Other Western country                                       | 14,712                                       | 9,178                                                   | 5,534                                                |
| Non-Western country                                         | 20,377                                       | 14,818                                                  | 5,559                                                |
| Civil status (N)                                            |                                              |                                                         |                                                      |
| Married or cohabiting                                       | 2,579,176                                    | 1,508,679                                               | 1,070,497                                            |
| Widow(er)                                                   | 162,413                                      | 87,728                                                  | 74,685                                               |
| Divorced                                                    | 206,651                                      | 132,881                                                 | 73,770                                               |
| Single                                                      | 572,686                                      | 434,999                                                 | 137,687                                              |
| Individual income (N) <sup>a</sup>                          |                                              |                                                         |                                                      |
| Q1                                                          | 714,373                                      | 451,019                                                 | 263,354                                              |
| Q2                                                          | 741,285                                      | 473,514                                                 | 267,771                                              |
| Q3                                                          | 740,373                                      | 474,696                                                 | 265,677                                              |
| Q4                                                          | 696,527                                      | 421,780                                                 | 274,747                                              |
| Q5                                                          | 628,368                                      | 343,278                                                 | 285,090                                              |
| Occupational status (N)                                     |                                              |                                                         |                                                      |
| Blue collar                                                 | 1,408,445                                    | 886,299                                                 | 522,146                                              |
| Low level white collar                                      | 622,475                                      | 397,455                                                 | 225,020                                              |
| High level white collar                                     | 435,448                                      | 276,915                                                 | 158,533                                              |
| Unemployed                                                  | 213,277                                      | 148,814                                                 | 64,463                                               |
| Retired                                                     | 841,281                                      | 454,804                                                 | 386,477                                              |
| Highest attained education (N)                              |                                              |                                                         |                                                      |
| Mandatory education                                         | 1,156,084                                    | 668,095                                                 | 487,989                                              |
| Secondary or vocational education                           | 1,667,850                                    | 1,033,161                                               | 634,689                                              |
| Medium or long education                                    | 696,992                                      | 463,031                                                 | 233,961                                              |
| High quality green space (N)                                |                                              |                                                         |                                                      |
| ≥ 15 % in 150 m radius                                      | 688,303                                      | 399,306                                                 | 288,997                                              |
| ≥ 20 % in 1000 m radius                                     | 854,232                                      | 489,779                                                 | 364,453                                              |
| Area-level factors (mean ± standard deviation) <sup>b</sup> |                                              |                                                         |                                                      |
| % of population with low income (1 <sup>st</sup> quartile)  | 4.7 ± 2.3                                    | 5.0 ± 2.5                                               | 4.2 ± 1.9                                            |
| % unemployed in population                                  | 1.6 ± 0.6                                    | 1.6 ± 0.6                                               | 1.6 ± 0.6                                            |
| % of population in manual labour                            | 14.7 ± 4.0                                   | 13.9 ± 4.1                                              | 15.9 ± 3.5                                           |
| % of population with only basic education                   | 12.1 ± 3.8                                   | 11.6 ± 3.9                                              | 13.0 ± 3.5                                           |
| % population with criminal record                           | 0.5 ± 0.3                                    | 0.5 ± 0.4                                               | 0.5 ± 0.3                                            |
| % single-parent families                                    | 5.2 ± 1.8                                    | 5.2 ± 1.8                                               | 5.1 ± 1.8                                            |

Note: Data were complete for all variables.

<sup>a</sup> Individual income quintiles were standardized by calendar year and sex.

<sup>b</sup> Based on the 2160 parishes available in Denmark

**Table S2.** Spearman correlations between road and railway traffic noise (10-y mean) at baseline.

|                                    | <b>Road<br/>L<sub>den, max</sub></b> | <b>Road<br/>L<sub>den, min</sub></b> | <b>Railway<br/>L<sub>den, max</sub></b> | <b>Railway<br/>L<sub>den, min</sub></b> |
|------------------------------------|--------------------------------------|--------------------------------------|-----------------------------------------|-----------------------------------------|
| <b>Road L<sub>den,max</sub></b>    | 1                                    | 0.49                                 | 0.28                                    | 0.22                                    |
| <b>Road L<sub>den,min</sub></b>    |                                      | 1                                    | 0.28                                    | 0.32                                    |
| <b>Railway L<sub>den,max</sub></b> |                                      |                                      | 1                                       | 0.91                                    |
| <b>Railway L<sub>den,min</sub></b> |                                      |                                      |                                         | 1                                       |

**Table S3.** Associations between 1-, 5-, and 10-year mean residential exposure to road traffic and railway noise (linear, per 10 dB) and risk of incident tinnitus: i) for the entire population; ii) considering only primary diagnosis of tinnitus; and iii) excluding individuals with previous diagnosis for outer and middle ear diseases.

| Noise exposure per 10 dB            | Entire population <sup>a</sup><br>HR (95% CI) | Only primary tinnitus diagnosis <sup>b</sup><br>HR (95% CI) | Excluding individuals with previous diagnosis for outer and middle ear diseases <sup>c</sup><br>HR (95% CI) |
|-------------------------------------|-----------------------------------------------|-------------------------------------------------------------|-------------------------------------------------------------------------------------------------------------|
| Road traffic, L <sub>den, max</sub> |                                               |                                                             |                                                                                                             |
| 1-year exposure                     | 1.008 (0.995, 1.021)                          | 1.039 (1.010, 1.069)                                        | 1.008 (0.995; 1.021)                                                                                        |
| 5-year exposure                     | 1.016 (1.003, 1.029)                          | 1.048 (1.018, 1.079)                                        | 1.017 (1.003; 1.031)                                                                                        |
| 10-year exposure                    | 1.018 (1.005, 1.032)                          | 1.055 (1.024, 1.087)                                        | 1.020 (1.006; 1.034)                                                                                        |
| Road traffic, L <sub>den, min</sub> |                                               |                                                             |                                                                                                             |
| 1-year exposure                     | 1.044 (1.025, 1.062)                          | 1.046 (1.006, 1.087)                                        | 1.046 (1.027; 1.066)                                                                                        |
| 5-year exposure                     | 1.052 (1.033, 1.071)                          | 1.058 (1.018, 1.101)                                        | 1.055 (1.036; 1.075)                                                                                        |
| 10-year exposure                    | 1.056 (1.037, 1.075)                          | 1.071 (1.029, 1.114)                                        | 1.059 (1.039; 1.079)                                                                                        |
| Railway, L <sub>den, max</sub>      |                                               |                                                             |                                                                                                             |
| 1-year exposure                     | 1.008 (0.978, 1.038)                          | 0.994 (0.936, 1.057)                                        | 1.009 (0.978; 1.040)                                                                                        |
| 5-year exposure                     | 1.003 (0.976, 1.030)                          | 0.970 (0.919, 1.024)                                        | 0.999 (0.972; 1.028)                                                                                        |
| 10-year exposure                    | 0.992 (0.967, 1.016)                          | 0.971 (0.925, 1.019)                                        | 0.988 (0.964; 1.014)                                                                                        |
| Railway, L <sub>den, min</sub>      |                                               |                                                             |                                                                                                             |
| 1-year exposure                     | 1.016 (0.977, 1.057)                          | 1.003 (0.925, 1.087)                                        | 1.018 (0.978; 1.059)                                                                                        |
| 5-year exposure                     | 0.999 (0.963, 1.036)                          | 0.966 (0.897, 1.041)                                        | 0.996 (0.959; 1.035)                                                                                        |
| 10-year exposure                    | 0.994 (0.960, 1.029)                          | 0.965 (0.900, 1.034)                                        | 0.993 (0.958; 1.029)                                                                                        |

Note: CI, confidence interval; HR, hazard ratio. Models were adjusted for age (underlying time scale), sex, calendar year, civil status, income, country of origin, occupational status, education, proportion of high quality green areas within 150 and 1000 m buffers, and a number of area-level socioeconomic variables: percent population with low income, with only basic education, who are unemployed, with manual labour, who are single-parent and with a criminal record, as well as mutual road traffic and railway noise adjustment.

<sup>a</sup> 40,692 cases; total N = 3,520,926

<sup>b</sup> Only cases with a primary tinnitus diagnosis: 8,792 cases; total N = 3,489,026.

<sup>c</sup> Excluding individuals with diagnosis for outer and middle ear diseases: 38,284 cases; total N = 3,455,725.

**Table S4.** Associations between categories of 10-year mean residential exposure to road traffic and railway noise at the most ( $L_{denmax}$ ) and least ( $L_{denmin}$ ) exposed façade and risk of tinnitus.

| 10-year noise exposure | $L_{denmax}$  |                      |                      | $L_{denmin}$  |         |                      |
|------------------------|---------------|----------------------|----------------------|---------------|---------|----------------------|
|                        | Category (dB) | N cases              | HR (95% CI)          | Category (dB) | N cases | HR (95% CI)          |
| Road traffic           | 41.9          | 4786                 | 1                    | 37.0          | 9151    | 1                    |
|                        | 46.5          | 3150                 | 1.032 (0.987, 1.080) | 41.6          | 6907    | 1.027 (0.995, 1.060) |
|                        | 49.6          | 4094                 | 1.041 (0.998, 1.086) | 44.4          | 7412    | 1.034 (1.001, 1.067) |
|                        | 52.5          | 5065                 | 1.056 (1.014, 1.099) | 47.4          | 6323    | 1.068 (1.032, 1.105) |
|                        | 55.5          | 5376                 | 1.042 (1.002, 1.084) | 50.3          | 4534    | 1.034 (0.995, 1.074) |
|                        | 58.5          | 5760                 | 1.040 (1.000, 1.082) | 53.3          | 3335    | 1.100 (1.054, 1.149) |
|                        | 61.3          | 5386                 | 1.060 (1.018, 1.103) | 56.2          | 1870    | 1.122 (1.064, 1.184) |
|                        | 64.3          | 3765                 | 1.062 (1.016, 1.111) | 59.1          | 788     | 1.206 (1.118, 1.301) |
|                        | 67.2          | 2029                 | 1.045 (0.990, 1.104) | 62.9          | 372     | 1.122 (1.008, 1.249) |
|                        | 70.2          | 899                  | 1.046 (0.972, 1.126) |               |         |                      |
| 73.3                   | 382           | 1.051 (0.945, 1.169) |                      |               |         |                      |
| Railway                | 35.0          | 30069                | 1                    | 35.0          | 32477   | 1                    |
|                        | 42.9          | 1090                 | 0.979 (0.922, 1.041) | 42.5          | 3001    | 0.988 (0.952, 1.026) |
|                        | 47.8          | 1783                 | 1.005 (0.958, 1.054) | 47.4          | 2666    | 1.002 (0.962, 1.043) |
|                        | 52.6          | 2555                 | 1.027 (0.986, 1.070) | 52.2          | 1735    | 0.956 (0.909, 1.005) |
|                        | 57.4          | 2347                 | 0.975 (0.934, 1.017) | 56.7          | 666     | 1.009 (0.932, 1.093) |
|                        | 62.1          | 1761                 | 0.986 (0.938, 1.036) | 61.9          | 147     | 0.927 (0.786, 1.094) |
|                        | 66.8          | 880                  | 1.004 (0.937, 1.076) |               |         |                      |
|                        | 71.5          | 207                  | 0.932 (0.811, 1.070) |               |         |                      |

Note: Hazard ratio (95% confidence interval). Results were based on the fully adjusted model (i.e. adjusted for age (underlying time scale), sex, calendar year, civil status, income, country of origin, occupational status, proportion of high quality green areas within 150 and 1000 m buffers, and a number of area-level socioeconomic variables: percent population with low income, with only basic education, who are unemployed, with manual labor, who are single-parent and with a criminal record, as well as mutual road traffic and railway noise adjustment). All covariates, apart from sex and region of origin, were included in the model as time-varying variables. Categories were given as the median of each exposure category.

**Table S5.** Effect modification analysis of associations between 10-y exposure (linear, per 10 dB) of road traffic noise at the most exposed façade and risk for incident tinnitus by sex, education, and hearing loss.

|                                 | <b>N cases</b> | <b>HR (95% CI)</b><br><b>L<sub>den</sub>max</b> | <b>HR (95% CI)</b><br><b>L<sub>den</sub>min</b> |
|---------------------------------|----------------|-------------------------------------------------|-------------------------------------------------|
| <b>Hearing loss</b>             |                |                                                 |                                                 |
| Yes                             | 32,913         | 0.979 (0.965; 0.993)                            | 0.957 (0.938; 0.976)                            |
| No                              | 7,779          | 1.106 (1.074; 1.138)                            | 1.253 (1.209; 1.299)                            |
|                                 |                |                                                 |                                                 |
| <b>Sex</b>                      |                |                                                 |                                                 |
| Men                             | 23,764         | 0.983 (0.967; 1.000)                            | 0.987 (0.965; 1.010)                            |
| Women                           | 16,928         | 1.072 (1.051; 1.093)                            | 1.160 (1.131; 1.190)                            |
|                                 |                |                                                 |                                                 |
| <b>Education</b>                |                |                                                 |                                                 |
| Low                             | 13,176         | 0.999 (0.978; 1.021)                            | 1.036 (1.007; 1.067)                            |
| Medium                          | 19,327         | 1.012 (0.993; 1.031)                            | 1.039 (1.014; 1.065)                            |
| High                            | 8,189          | 1.071 (1.041; 1.102)                            | 1.132 (1.092; 1.173)                            |
|                                 |                |                                                 |                                                 |
| <b>Income</b>                   |                |                                                 |                                                 |
| Low                             | 9,785          | 0.996 (0.972; 1.021)                            | 1.024 (0.991; 1.057)                            |
| Medium                          | 23,938         | 1.018 (1.001; 1.035)                            | 1.048 (1.025; 1.072)                            |
| High                            | 6,969          | 1.055 (1.023; 1.088)                            | 1.130 (1.087; 1.175)                            |
|                                 |                |                                                 |                                                 |
| <b>Green space (150m)</b>       |                |                                                 |                                                 |
| Yes                             | 32,313         | 1.021 (0.994; 1.049)                            | 1.055 (1.019; 1.091)                            |
| No                              | 8,379          | 1.018 (1.003; 1.033)                            | 1.056 (1.035; 1.078)                            |
|                                 |                |                                                 |                                                 |
| <b>Occupation – Blue collar</b> |                |                                                 |                                                 |
| Yes                             | 22,766         | 1.011 (0.994; 1.028)                            | 1.047 (1.023; 1.071)                            |
| No                              | 14,179         | 1.037 (1.015; 1.060)                            | 1.088 (1.058; 1.119)                            |
|                                 |                |                                                 |                                                 |
| <b>Comorbidity</b>              |                |                                                 |                                                 |
| Yes                             | 8,240          | 1.002 (0.975; 1.029)                            | 1.028 (0.993; 1.065)                            |
| No                              | 32,452         | 1.021 (1.006; 1.036)                            | 1.061 (1.040; 1.083)                            |

Note: Hazard ratio (95% confidence interval). Results were based on the fully adjusted model (i.e. adjusted for age (underlying time scale), sex, calendar year, civil status, income, country of origin, occupational status, proportion of high quality green areas within 150 and 1000 m buffers, and a number of area-level socioeconomic variables: percent population with low income, with only basic education, who are unemployed, with manual labor, who are single-parent and with a criminal record, as well as mutual road traffic and railway noise adjustment). All covariates, apart from sex and region of origin, were included in the model as time-varying variables.

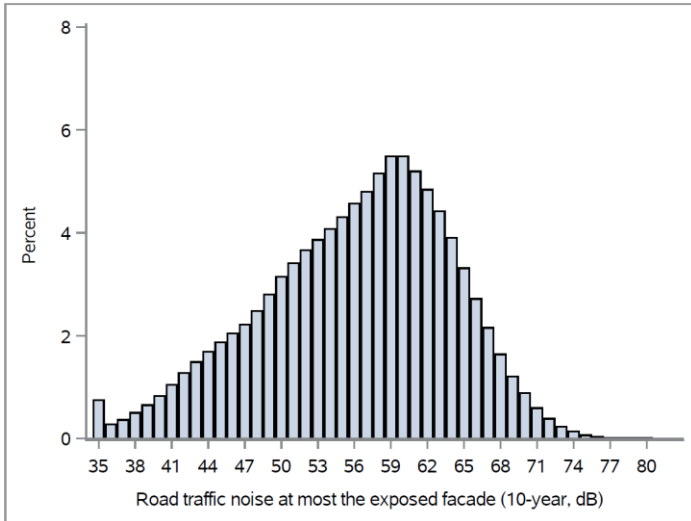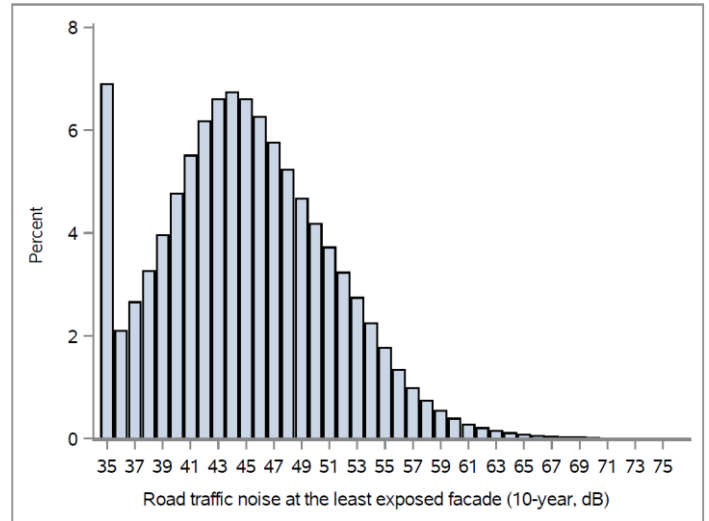

**Figure S1.** Distribution of road traffic noise at the most and least exposure façade (10-year mean at baseline, i.e. time-fixed) for the entire study population (N = 3,520,926).

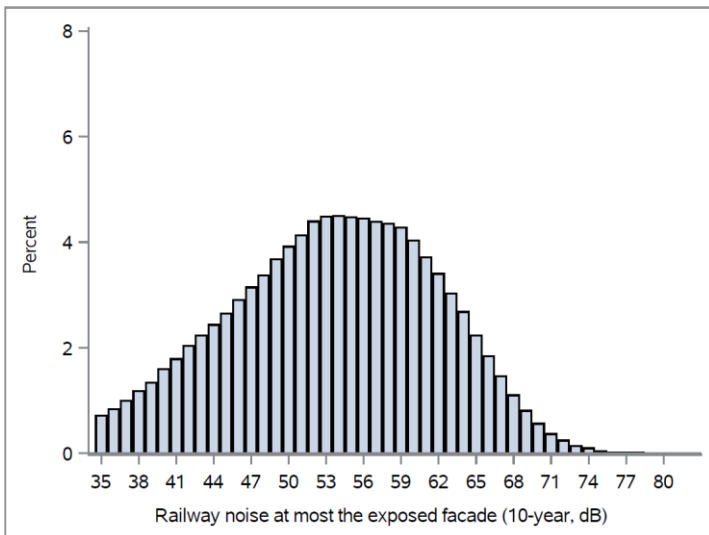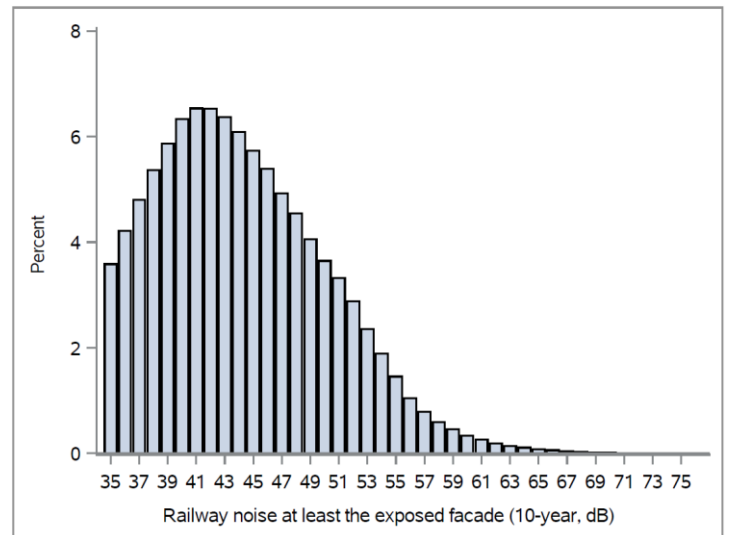

**Figure S2.** Distribution of railway noise at the most and least exposure façade (10-year mean at baseline, i.e. time-fixed) for all individuals exposed to railway noise  $\geq 35$  dB (N = 1,577,184 and N = 1,416,509 for most and least exposed façades, respectively).



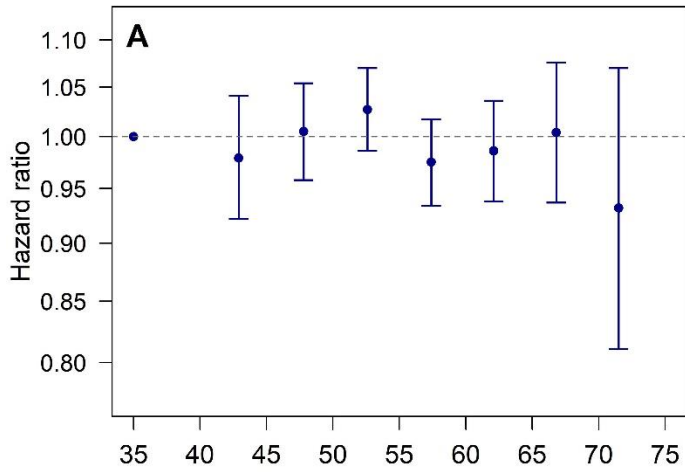

Railway noise at the most exposed façade (10-year, dB)

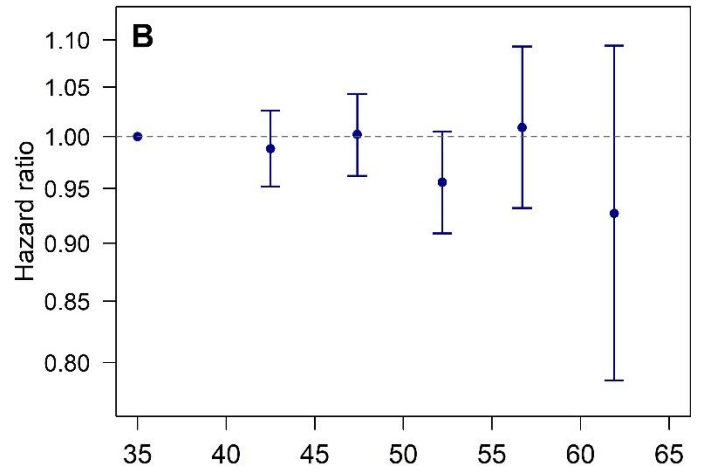

Railway noise at the least exposed façade (10-year, dB)

**Figure S3.** Association between 10-year mean exposure to railway noise at the most (A) and least (B) exposed façades and risk of tinnitus using the fully adjusted model. The vertical bars show hazard ratios with 95 % confidence interval at the median of the exposure categories compared with the reference category. Reference category was <40 dB. Risk estimates and number of cases for each exposure category are shown in Table S4.
