# Supplementary material
Source: PubMed Central journal article supplement (PMC9891135)
Supplement: ehp11248.smcontents.508.pdf [file ehp11248.smcontents.508.pdf]

**Note to readers with disabilities:** *EHP* strives to ensure that all journal content is accessible to all readers. However, some figures and Supplemental Material published in *EHP* articles may not conform to [508 standards](#) due to the complexity of the information being presented. If you need assistance accessing journal content, please contact [ehp508@niehs.nih.gov](mailto:ehp508@niehs.nih.gov). Our staff will work with you to assess and meet your accessibility needs within 3 working days.

### **Supplemental Material**

#### **Transportation Noise and Risk of Tinnitus: A Nationwide Cohort Study from Denmark**

Manuella Lech Cantuaria, Ellen Raben Pedersen, Aslak Harbo Poulsen, Ole Raaschou-Nielsen, Ulla Arthur Hvidtfeldt, Gregor Levin, Steen Solvang Jensen, Jesper Hvass Schmidt, and Mette Sørensen

#### **Table of Contents**

**Table S1.** Baseline characteristics of the study population (Denmark, 2000 – 2017) according to road traffic noise exposure at the most exposed façade.

**Table S2.** Spearman correlations between road and railway traffic noise (10-y mean) at baseline.

**Table S3.** Associations between 1-, 5-, and 10-year mean residential exposure to road traffic and railway noise (linear, per 10 dB) and risk of incident tinnitus: i) for the entire population; ii) considering only primary diagnosis of tinnitus; and iii) excluding individuals with previous diagnosis for outer and middle ear diseases.

**Table S4.** Associations between categories of 10-year mean residential exposure to road traffic and railway noise at the most ( $L_{denmax}$ ) and least ( $L_{denmin}$ ) exposed façade and risk of tinnitus.

**Table S5.** Effect modification analysis of associations between 10-y exposure (linear, per 10 dB) of road traffic noise at the most exposed façade and risk for incident tinnitus by sex, education, and hearing loss.

**Figure S1.** Distribution of road traffic noise at the most and least exposure façade (10-year mean at baseline, i.e. time-fixed) for the entire study population ( $N = 3,520,926$ ).

**Figure S2.** Distribution of railway noise at the most and least exposure façade (10-year mean at baseline, i.e. time-fixed) for all individuals exposed to railway noise  $\geq 35$  dB ( $N = 1,577,184$  and  $N = 1,416,509$  for most and least exposed façades, respectively).

**Figure S3.** Association between 10-year mean exposure to railway noise at the most (A) and least (B) exposed façades and risk of tinnitus using the fully adjusted model. The vertical bars show hazard ratios with 95 % confidence interval at the median of the exposure categories compared with the reference category. Reference category was <40 dB. Risk estimates and number of cases for each exposure category are shown in Table S4.
